# Supplementary material for: A promising role of noble metal NPs@MOFs in chondrosarcoma management
Source: Royal Society of Chemistry journal article supplement (doi:10.1039/d4nr03878a), 2024-12-09
Supplement: d4nr03878a1.pdf [file d4nr03878a1.pdf]

1 Supplementary materials for:

2 **The Promising Role of Noble Metal NPs@MOFs in Chondrosarcoma Management**

3 Ziheng Huang<sup>1</sup>, Keyue Tian<sup>1</sup>, Yiyuan Xue<sup>1</sup>, Feng Luo<sup>1,2\*</sup>

4 <sup>1</sup> State Key Laboratory of Oral Diseases, National Clinical Research Center for Oral Diseases, West

5 China School of Stomatology, Sichuan University, Chengdu 610041, China

6 <sup>2</sup> Department of General Dentistry, West China School of Stomatology, Sichuan University, Chengdu

7 610041, China

8 \*Corresponding author: Feng Luo MD, DDS, PhD, lecturer; Department of General Dentistry, West

9 China School of Stomatology, Sichuan University, No. 14, Section 3, Renmin Nanlu, Chengdu 610041,

10 China;

11 Tel.: +86 28 85503671/13488904276; Fax: 86-28-85503474;

12 Email: [luofeng0122@scu.edu.cn](mailto:luofeng0122@scu.edu.cn)

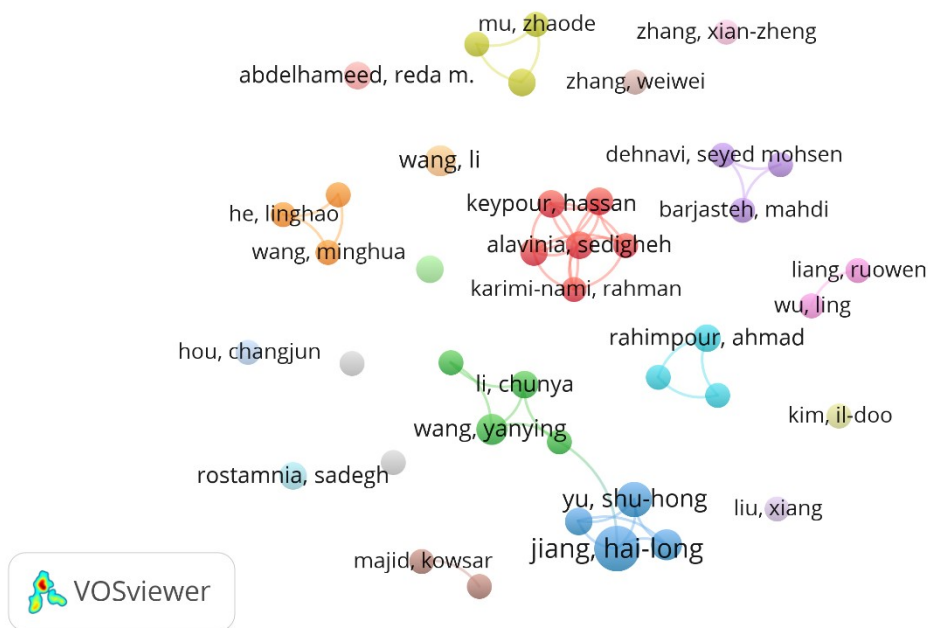

**Figure S1.** Network maps of key authors in the field of noble metal nanoparticles (NPs) and metal-organic frameworks (MOFs).

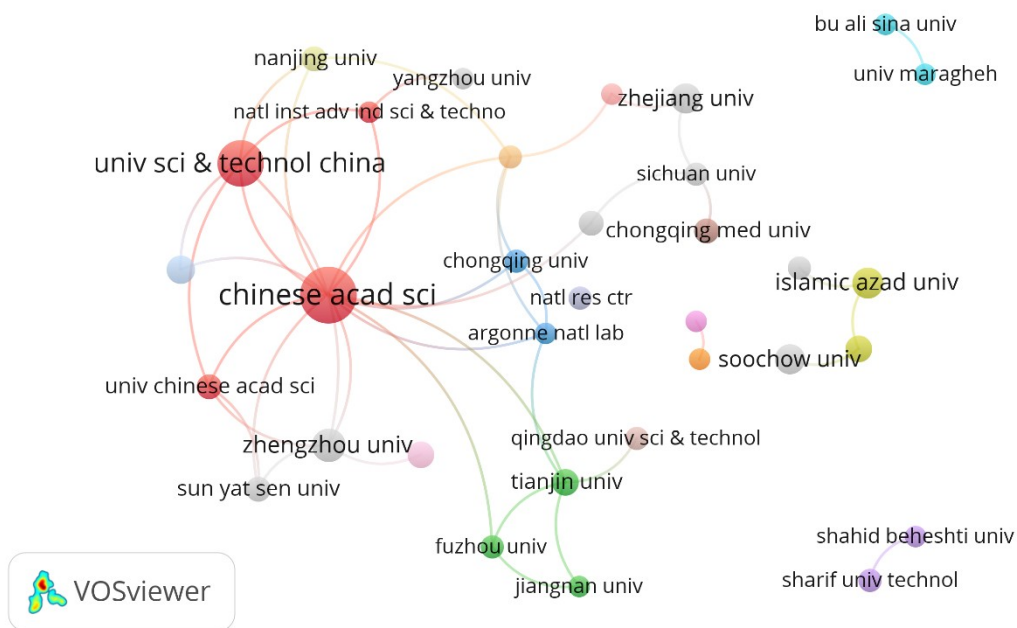

**Figure S2.** Network maps of main institutions in the field of noble metal nanoparticles (NPs) and metal-organic frameworks (MOFs).

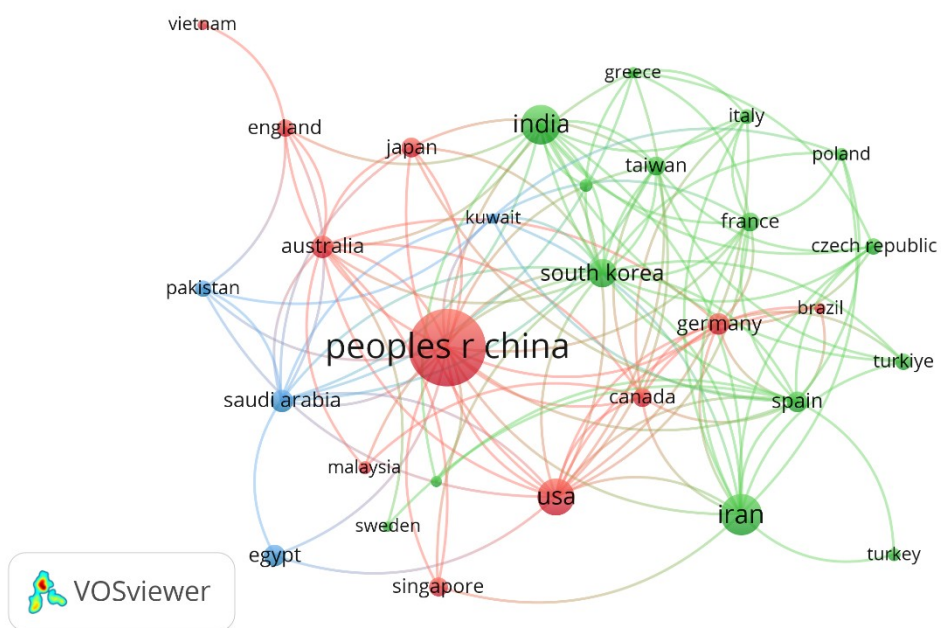

**Figure S3.** Network maps of main countries in the field of noble metal nanoparticles (NPs) and metal-organic frameworks (MOFs).
